# Supplementary material for: Non-persistence to Oral Anticoagulation Treatment in Patients with Non-valvular Atrial Fibrillation in the USA.
Source: Springer Nature journal article supplement (doi:10.1007/s40256-021-00501-w), 2022-05-01
Supplement: MOESM1 [file 24108648]

**Supplemental Material:**

**Non-Persistence to Oral Anticoagulation Treatment in Non-Valvular Atrial Fibrillation  
Patients in the United States**

**American Journal of Cardiovascular Drugs**

**Corresponding Author:**

**Allison Keshishian**

**Director, Health Economics and Outcome Research**

**STATinMED Research**

**4110 Varsity Dr, Ann Arbor, MI 48108**

**Email: [akeshishian@statinmed.com](mailto:akeshishian@statinmed.com)**

**Phone: 734-222-5426**

**Supplemental Table 1. Proportion of NVAF Patients with Time-varying Event**

|                                                              | Warfarin Cohort<br>(N = 317,337) |       | Apixaban Cohort<br>(N = 363,823) |       | Dabigatran Cohort<br>(N = 57,121) |       | Rivaroxaban Cohort<br>(N = 282,831) |       |
|--------------------------------------------------------------|----------------------------------|-------|----------------------------------|-------|-----------------------------------|-------|-------------------------------------|-------|
|                                                              | N                                | %     | N                                | %     | N                                 | %     | N                                   | %     |
| <b>Stroke/Systemic Embolism (SE)<br/>(primary discharge)</b> | 12,955                           | 4.1%  | 7,673                            | 2.1%  | 1,938                             | 3.4%  | 7,920                               | 2.8%  |
| Hemorrhagic Stroke                                           | 1,932                            | 0.6%  | 910                              | 0.3%  | 191                               | 0.3%  | 987                                 | 0.3%  |
| Ischemic Stroke                                              | 10,254                           | 3.2%  | 6,458                            | 1.8%  | 1,629                             | 2.9%  | 6,544                               | 2.3%  |
| SE                                                           | 847                              | 0.3%  | 353                              | 0.1%  | 124                               | 0.2%  | 444                                 | 0.2%  |
| <b>Major Bleeding<br/>(primary discharge)</b>                | 32,094                           | 10.1% | 17,146                           | 4.7%  | 3,916                             | 6.9%  | 19,882                              | 7.0%  |
| Gastrointestinal (GI)<br>Bleeding                            | 15,474                           | 4.9%  | 8,758                            | 2.4%  | 2,181                             | 3.8%  | 10,729                              | 3.8%  |
| Intracranial Hemorrhage<br>(ICH)                             | 5,711                            | 1.8%  | 2,936                            | 0.8%  | 598                               | 1.0%  | 2,734                               | 1.0%  |
| Other sites                                                  | 12,575                           | 4.0%  | 6,262                            | 1.7%  | 1,373                             | 2.4%  | 7,622                               | 2.7%  |
| <b>Any Inpatient Visit<br/>with Atrial Fibrillation</b>      | 34,280                           | 10.8% | 34,001                           | 9.3%  | 6,942                             | 12.2% | 31,333                              | 11.1% |
| <b>New Acute Renal<br/>Failure</b>                           | 66,898                           | 21.1% | 44,977                           | 12.4% | 8,817                             | 15.4% | 40,286                              | 14.2% |
| <b>New Chronic Renal<br/>Failure</b>                         | 38,731                           | 12.2% | 24,904                           | 6.8%  | 5,651                             | 9.9%  | 24,134                              | 8.5%  |
| <b>New Cancer</b>                                            | 24,941                           | 7.9%  | 15,679                           | 4.3%  | 4,144                             | 7.3%  | 17,293                              | 6.1%  |
| <b>Cardioversions and<br/>Catheter Ablations</b>             | 13,547                           | 4.3%  | 14,851                           | 4.1%  | 3,263                             | 5.7%  | 14,503                              | 5.1%  |

**Supplemental Table 2. Descriptive Outcomes for Sensitivity Analyses**

|                                                      | Warfarin Cohort<br>(N = 317,337) |       | Apixaban Cohort<br>(N = 363,823) |       | Dabigatran Cohort<br>(N = 57,121) |       | Rivaroxaban Cohort<br>(N = 282,831) |       |
|------------------------------------------------------|----------------------------------|-------|----------------------------------|-------|-----------------------------------|-------|-------------------------------------|-------|
|                                                      | N/Mean                           | %/SD  | N/Mean                           | %/SD  | N/Mean                            | %/SD  | N/Mean                              | %/SD  |
| <b>Sensitivity Analysis Using 12 Month Follow-up</b> |                                  |       |                                  |       |                                   |       |                                     |       |
| Non-Persistent Patients                              | 153,408                          | 48.3% | 139,732                          | 38.4% | 32,087                            | 56.2% | 137,408                             | 48.6% |
| Type of Change in Therapy                            |                                  |       |                                  |       |                                   |       |                                     |       |
| Discontinued                                         | 133,949                          | 42.2% | 130,918                          | 36.0% | 27,834                            | 48.7% | 125,857                             | 44.5% |
| Switched                                             | 19,459                           | 6.1%  | 8,814                            | 2.4%  | 4,253                             | 7.5%  | 11,551                              | 4.1%  |
| <b>Sensitivity Analysis Using 30-Day Gap</b>         |                                  |       |                                  |       |                                   |       |                                     |       |
| Non-Persistent Patients                              | 253,248                          | 79.8% | 226,768                          | 62.3% | 46,646                            | 81.7% | 205,060                             | 72.5% |
| Type of Change in Therapy                            |                                  |       |                                  |       |                                   |       |                                     |       |
| Discontinued                                         | 233,178                          | 73.5% | 217,442                          | 59.8% | 42,126                            | 73.7% | 192,483                             | 68.1% |
| Time-to-Discontinuation (days)                       | 230.0                            | 266.2 | 193.4                            | 220.0 | 209.3                             | 271.4 | 206.6                               | 255.6 |
| Switched                                             | 20,070                           | 6.3%  | 9,326                            | 2.6%  | 4,520                             | 7.9%  | 12,577                              | 4.4%  |
| Time-to-Switch (days)                                | 155.3                            | 238.0 | 132.7                            | 191.1 | 164.2                             | 258.0 | 167.5                               | 249.4 |
| <b>Sensitivity Analysis Including INR Testing</b>    |                                  |       |                                  |       |                                   |       |                                     |       |
| Non-Persistent Patients                              | 207,565                          | 65.4% | 172,574                          | 47.4% | 41,108                            | 72.0% | 171,799                             | 60.7% |
| Type of Change in Therapy                            |                                  |       |                                  |       |                                   |       |                                     |       |
| Discontinued                                         | 180,924                          | 57.0% | 162,455                          | 44.7% | 35,869                            | 62.8% | 157,717                             | 55.8% |
| Time-to-Discontinuation (days)                       | 311                              | 333.1 | 214                              | 240.2 | 250                               | 317.7 | 223                                 | 275.5 |
| Switched                                             | 26,641                           | 8.4%  | 10,119                           | 2.8%  | 5,239                             | 9.2%  | 14,082                              | 5.0%  |
| Time-to-Switch (days)                                | 217.8                            | 304.4 | 154.1                            | 213.6 | 207.5                             | 299.6 | 197.9                               | 279.4 |

INR: International Normalized Ratio; OAC: Oral Anticoagulant; SD: Standard Deviation

**Supplemental Table 3. Adjusted Hazard Ratios of Non-persistence for Sensitivity Analyses**

|               | Sensitivity Analysis Using 12 Month Follow-up |         | Sensitivity Analysis Using 30 Day Gap   |         | Sensitivity Analysis Including INR Testing |         |
|---------------|-----------------------------------------------|---------|-----------------------------------------|---------|--------------------------------------------|---------|
|               | Hazard Ratio* (95% Confidence Interval)       | p-value | Hazard Ratio* (95% Confidence Interval) | p-value | Hazard Ratio* (95% Confidence Interval)    | p-value |
| <b>Cohort</b> |                                               |         |                                         |         |                                            |         |
| Warfarin      | Ref                                           |         | Ref                                     |         | Ref                                        |         |
| Apixaban      | 0.76 (0.76-0.77)                              | <.001   | 0.76 (0.75-0.76)                        | <.001   | 0.78 (0.77-0.78)                           | <.001   |
| Dabigatran    | 1.24 (1.22-1.25)                              | <.001   | 1.09 (1.08-1.10)                        | <.001   | 1.26 (1.25-1.27)                           | <.001   |
| Rivaroxaban   | 1.03 (1.02-1.04)                              | <.001   | 0.90 (0.90-0.91)                        | <.001   | 1.02 (1.01-1.03)                           | <.001   |
|               |                                               |         |                                         |         |                                            |         |
| Rivaroxaban   | Ref                                           |         | Ref                                     |         |                                            |         |
| Apixaban      | 0.74 (0.74-0.75)                              | <.001   | 0.84 (0.83-0.84)                        | <.001   |                                            |         |
| Dabigatran    | 1.20 (1.19-1.22)                              | <.001   | 1.21 (1.20-1.22)                        | <.001   |                                            |         |
|               |                                               |         |                                         |         |                                            |         |
| Dabigatran    | Ref                                           |         | Ref                                     |         |                                            |         |
| Apixaban      | 0.62 (0.61-0.63)                              | <.001   | 0.70 (0.69-0.70)                        | <.001   |                                            |         |

\*Models adjusted for age, sex, region, AF index year, Deyo-CCI, bleeding history, history of congestive heart failure, diabetes mellitus, hypertension, renal disease, liver disease, cancer, myocardial infarction, cardioversion and catheter ablations, dyspepsia or stomach discomfort, non-stroke/SE peripheral vascular disease, stroke/SE, transient ischemic attack, anemia and coagulation defects, alcoholism, peripheral artery disease, coronary artery disease, and baseline medication use.

**Supplemental Figure 1. Sensitivity Analysis Using 30 Day Gap for Cumulative Incidence of Non-persistence of NVAF Patients**

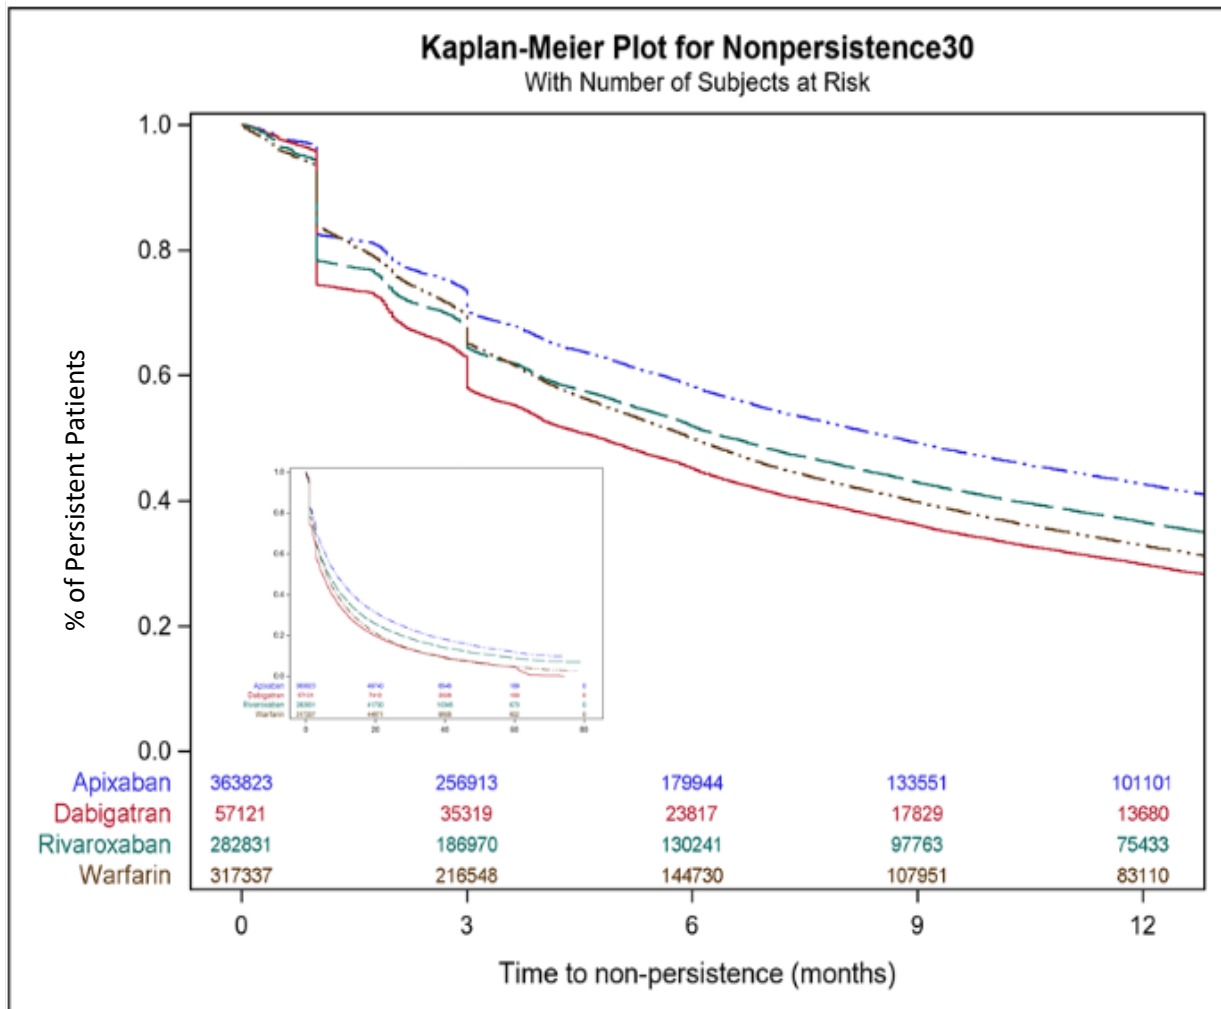

**Supplemental Figure 2. Sensitivity analysis including INR claims for Cumulative Incidence of Non-persistence Among NVAF Patients\***

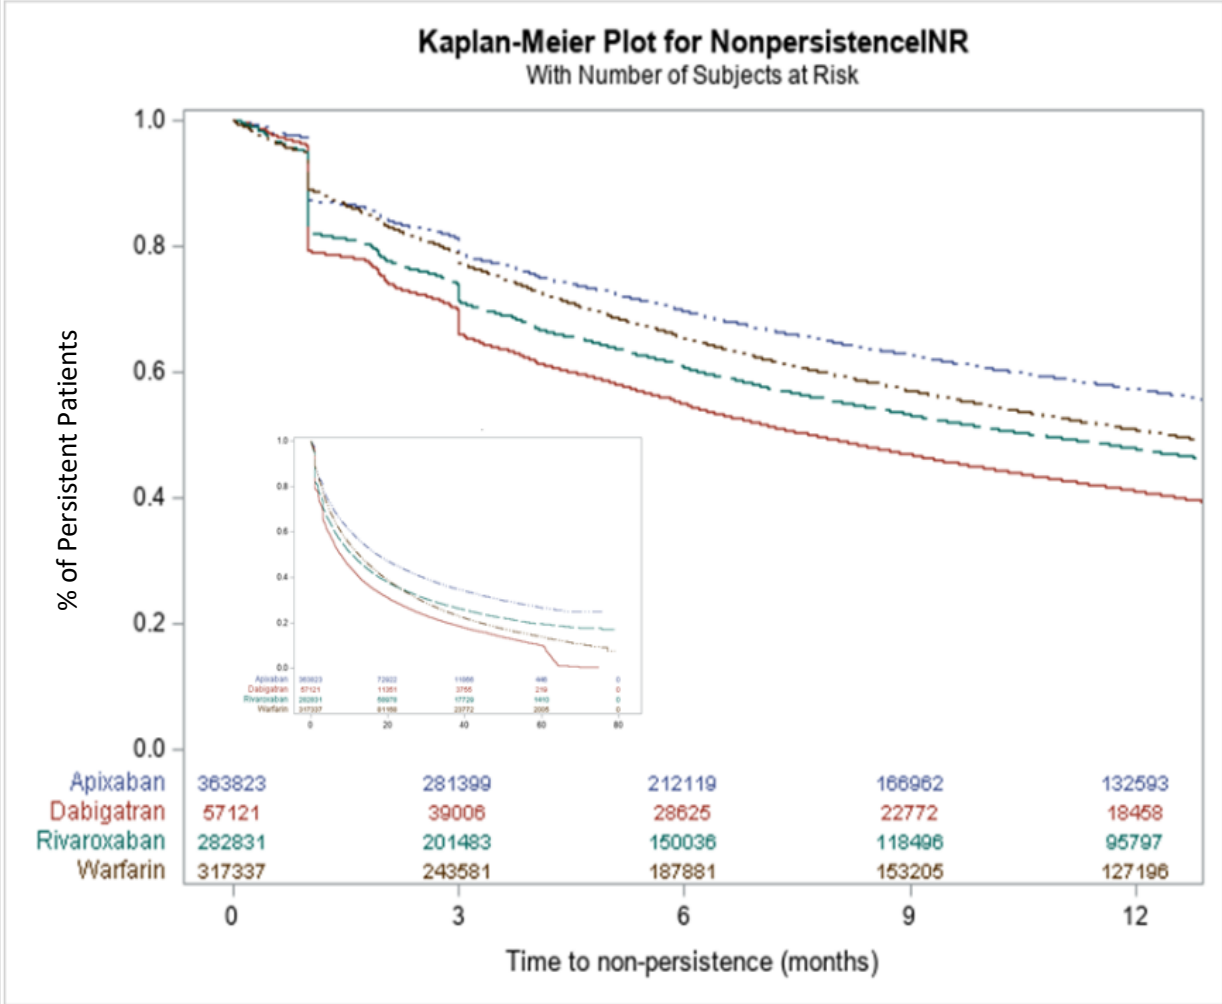

\*Warfarin non-persistence was redefined with the inclusion of INR records to extend warfarin treatment episode.
